## CORRESPONDENCE

## References

1. Pennant JH, White PF: The laryngeal mask airway: Its uses in anesthesiology. *ANESTHESIOLOGY* 79:144-163, 1993
2. American Society of Anesthesiologists: Practice Guidelines for Management of the Difficult Airway: A Report by the American Society of Anesthesiologists' Task Force on Management of the Difficult Airway. *ANESTHESIOLOGY* 78:597-602, 1993
3. Brimacombe J, Berry A: Mallampatti classification and laryngeal mask insertion. *Anaesthesia* 48:347, 1993
4. Mahiou P, Narchi P, Veyrac P, Germond M, Gory G, Bazin G: Is the laryngeal mask easy to use in case of difficult intubation? (abstract). *ANESTHESIOLOGY* 77:A1228, 1992
5. Brimacombe J, Berry A: Laryngeal mask airway insertion: A comparison of the standard versus neutral position in normal patients

Anesthesiology  
80:707, 1994

© 1994 American Society of Anesthesiologists, Inc.  
J. B. Lippincott Company, Philadelphia

**In Reply:**—We question Brimacombe and colleagues' suggestion that there is "considerable evidence" that the laryngeal mask airway (LMA) has a role in emergency airway management. Although it has been suggested that the LMA is a useful device for managing emergency airway problems, the evidence to date is purely anecdotal. We are currently performing a controlled study of the LMA in managing the difficult airway in the field; however, until the results of this and other similar research are available, the suitability of the LMA for the emergency airway situation can be considered only speculative. Furthermore, adequately controlled studies in this area are exceedingly difficult to perform because of the infrequency and unpredictability with which the difficult airway is encountered.

Since we submitted our review article,<sup>1</sup> nearly 150 articles on the LMA have appeared in the anesthesia literature. At the time of our submission, neck immobility was regarded as a contraindication to use of the LMA.<sup>2</sup> We agree that recent work suggests that the inability to extend the head is not an absolute contraindication to the use of the LMA.<sup>3</sup> In fact, the LMA may be a very useful technique for obtaining a patient airway in these cases. However, there will continue to be situations in which the LMA cannot secure these airways (e.g., it may prove impossible to advance the LMA cuff into the hypopharynx in some patients with severe cervical spine pathology),<sup>4</sup> and alternative techniques and equipment must be available.

The ability to perform a blind intubation through the LMA depends on the device used (e.g., gum elastic bougie,<sup>5</sup> tracheal tube,<sup>6</sup> or Cook airway exchange catheter)<sup>7</sup> and the degree of muscle relaxation. The 30% success rate reported by Brimacombe and Berry<sup>7</sup> using the Cook airway exchange catheter suggests that this device is not suitable because of its rigidity and the difficulty in angulating its distal tip. In an emergency situation, it may indeed be safer to continue positive-pressure ventilation *via* the LMA (while maintaining cricoid pressure) rather than attempt to perform a blind intubation. Given the greater than 84% chance of success with a bougie or tracheal tube, a quick attempt at blind intubation is not unreasonable. However, if spontaneous respiration is anticipated to resume rapidly, it may be safer to allow the patient to awaken with the LMA in place.

We agree that the LMA is an extremely useful airway device for

with a view to its use in cervical spine instability. *Anaesthesia* 48: 670-671, 1993

6. Pennant JH, Pace NA, Gajraj NM: Use of the laryngeal mask airway in the immobilized cervical spine (abstract). *ANESTHESIOLOGY* 77:A1063, 1992
7. Silk JM, Hill HM, Calder I: Difficult intubation and the laryngeal mask. *Eur J Anaesthesiol* 4:47-51, 1991
8. Brimacombe J, Berry A: Placement of the Cook airway exchange catheter via the laryngeal mask airway. *Anaesthesia* 48:351-352, 1993
9. Brimacombe J, Berry A, White A: A proposed algorithm for use of the laryngeal mask airway during failed intubation in the patient with a full stomach. *Anesth Analg* 77:398-399, 1993

(Accepted for publication November 21, 1993.)

both routine (elective) and emergency cases. However, carefully controlled clinical trials, rather than additional anecdotal reports, are needed.

**John H. Pennant, M.A., M.B., B.S., F.R.C.A.**  
Assistant Professor of Anesthesiology

**Paul F. White, Ph.D., M.D.**  
Professor of Anesthesiology

Department of Anesthesiology  
The University of Texas Southwestern Medical Center  
5323 Harry Hines Boulevard  
Dallas, Texas 75235-8894

## References

1. Pennant JH, White PF: The laryngeal mask airway: Its uses in anesthesiology. *ANESTHESIOLOGY* 79:144-163, 1993
2. Fisher JA, Ananthanarayan C, Edelist G: Role of the laryngeal mask in airway management (editorial). *Can J Anaesth* 39:1-3, 1992
3. Pennant JH, Pace NA, Gajraj NM: Role of the laryngeal mask airway in the immobile cervical spine. *J Clin Anesth* 5:226-230, 1992
4. Silk JM, Hill HM, Calder I: Difficult intubation and the laryngeal mask. *Eur J Anaesthesiol Suppl* 4:47-51, 1991
5. Allison A, McCrory J: Tracheal placement of a gum elastic bougie using the laryngeal mask airway (letter). *Anaesthesia* 45:419-420, 1990
6. Heath M: Endotracheal intubation through the laryngeal mask: Helpful when laryngoscopy is difficult or dangerous. *Eur J Anaesthesiol Suppl* 4:41-45, 1991
7. Brimacombe J, Berry A: Placement of a Cook airway exchange catheter via the laryngeal mask airway (letter). *Anaesthesia* 48:351-352, 1993

(Accepted for publication November 21, 1993.)
